# Supplementary material for: Synthesis and application of a MOF-derived Ni@C catalyst by the guidance from an in situ hot stage in TEM
Source: Royal Society of Chemistry journal article supplement (doi:10.1039/c7ra03162a), 2017-01-01
Supplement: c7ra03162a1.pdf [file c7ra03162a1.pdf]

*Supporting Information:*

## Synthesis and application of a MOF-Derived Ni@C catalyst by the guidance from an *in situ* hot stage in TEM

Dan Xu, Ying Pan, Mingyi Chen, Qinying Pan, Liangkui Zhu, Ming Xue, Daliang Zhang,\*  
Qianrong Fang, and Shilun Qiu\*

State Key Laboratory of Inorganic Synthesis and Preparative Chemistry, Jilin University,  
Changchun, 130012, China

### Table of contents

- I. **Fig. S1** Experimental (black) and simulated (red) PXRD patterns of Ni-ntca.
- II. **Fig. S2** The hot stage TEM images at (a) room temperature, (b) Selected Area Electron Diffraction (SAED) pattern of (a), (c) 300 °C, (d) SAED pattern of (c), (e) 400 °C, (f) 500 °C, (g) 600 °C, and (h) 700 °C.
- III. **Fig. S3** TEM images (a) 0 min and the corresponding Selected Area Electron Diffraction (SAED) patterns in [100] zone axis (b) 0 min; (c) 5 min; (d) 10 min; (e) 15 min; (f) 30 min; (g) 60 min; (h) 120 min of Ni-ntca under beam irradiating.
- IV. **Fig. S4** PXRD patterns of Ni@C-300 (black) and the simulated data of cubic phased Ni (red, JCPDS no. 04-0850).
- V. **Fig. S5** The distribution of particle size for Ni@C-600.
- VI. **Fig. S6** TEM images and Selected Area Electron Diffraction (SAED) patterns of Ni@C-400 (top) and Ni@C-500 (bottom).
- VII. **Fig. S7** The image of scanning transmission electron microscope (STEM) and Ni mapping data of Ni@C-400 (a, b), Ni@C-500 (c, d) and Ni@C-600 (e, f).
- VIII. **Fig. S8** N<sub>2</sub> absorption-desorption isotherm (left) and its corresponding pore size distribution (right) of Ni-ntca.
- IX. **Fig. S9** TEM images of Ni@C-600 after 8 cycles.

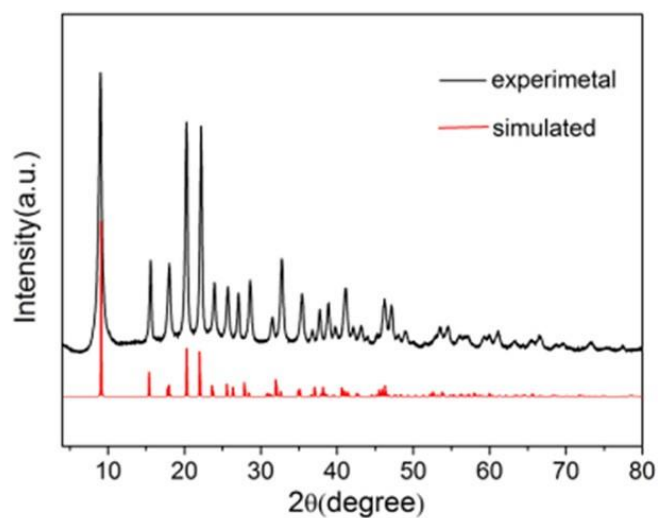

**Fig. S1** Experimental (black) and simulated (red) PXRD patterns of Ni-ntca.

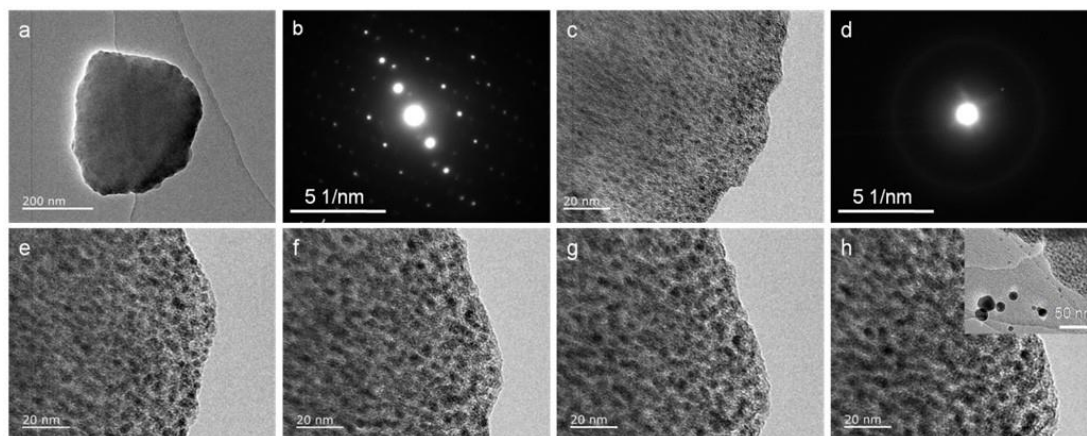

**Fig. S2** The hot stage TEM images at (a) room temperature, (b) Selected Area Electron Diffraction (SAED) pattern of (a), (c) 300 °C, (d) SAED pattern of (c), (e) 400 °C, (f) 500 °C, (g) 600 °C, and (h) 700 °C.

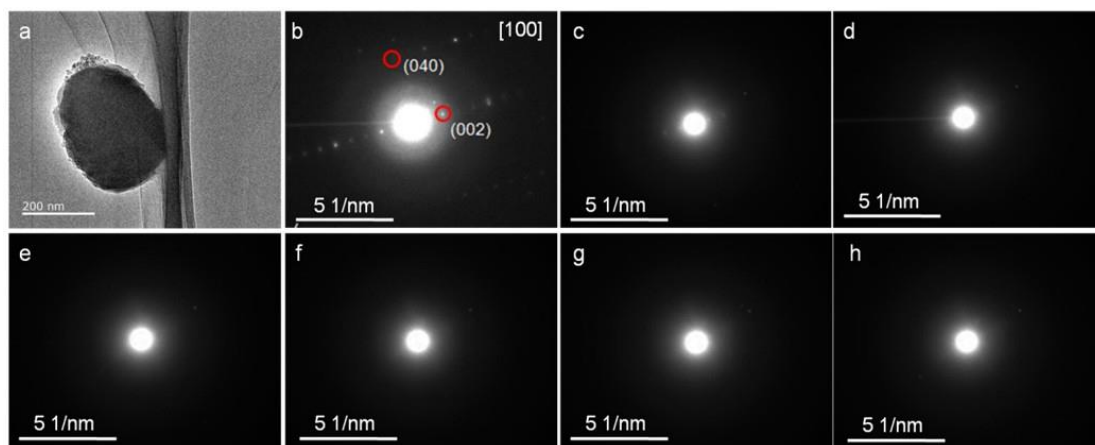

**Fig. S3** TEM images (a) 0 min and the corresponding Selected Area Electron Diffraction (SAED) patterns in [100] zone axis (b) 0 min; (c) 5 min; (d) 10 min; (e) 15 min; (f) 30 min; (g) 60 min; (h) 120 min of Ni-ntca under beam irradiating.

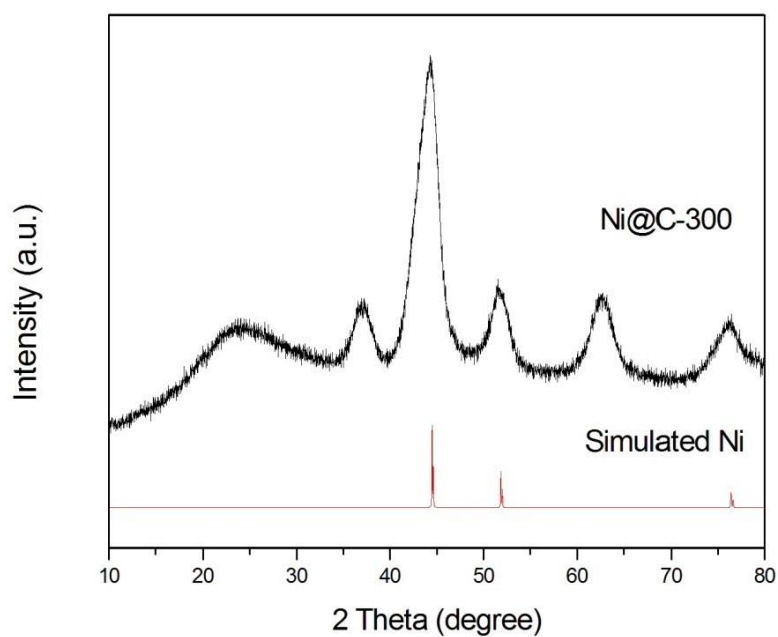

**Fig. S4** PXRD patterns of Ni@C-300 (black) and the simulated data of cubic phased Ni (red, JCPDS no. 04-0850).

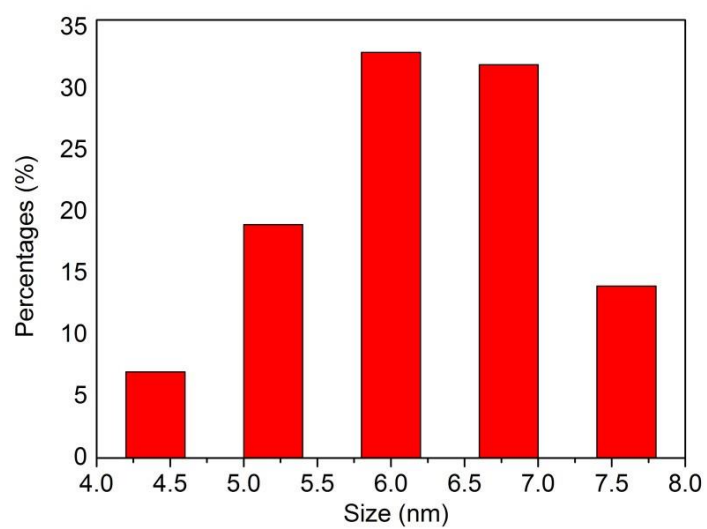

**Fig. S5** The distribution of particle size for Ni@C-600.

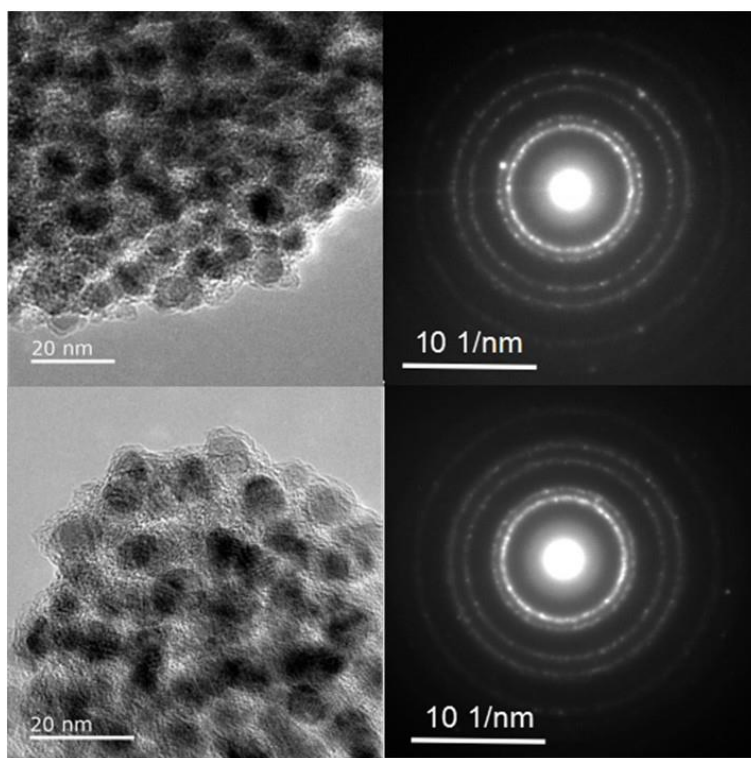

**Fig. S6** TEM images and Selected Area Electron Diffraction (SAED) patterns of Ni@C-400 (top) and Ni@C-500 (bottom).

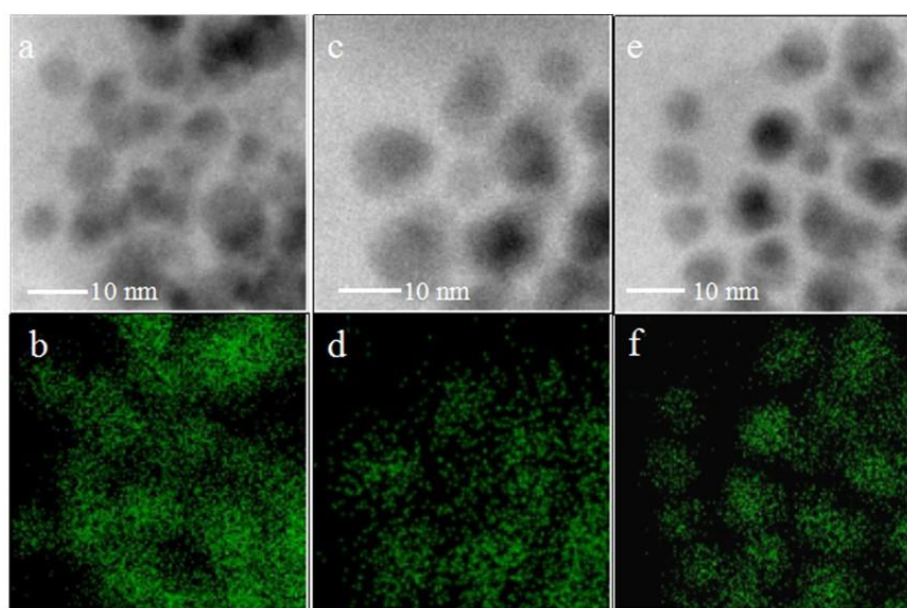

**Fig. S7** The image of scanning transmission electron microscope (STEM) and Ni mapping data of Ni@C-400 (a, b), Ni@C-500 (c, d) and Ni@C-600 (e, f).

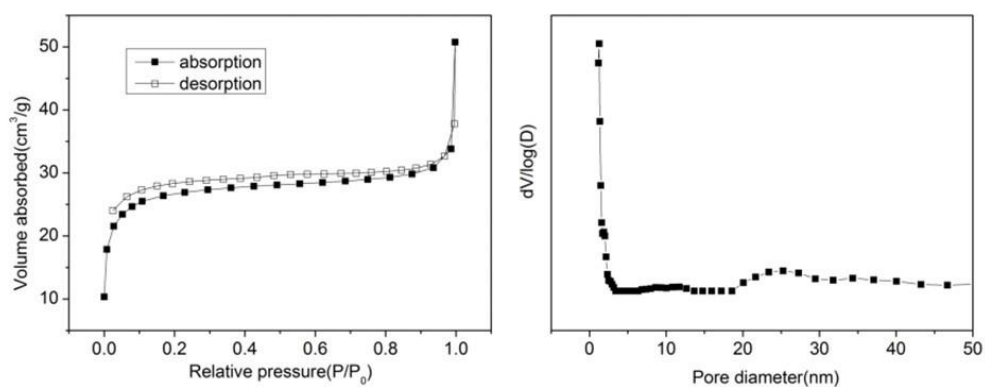

**Fig. S8** N<sub>2</sub> absorption-desorption isotherm (left) and its corresponding pore size distribution (right) of Ni-ntca.

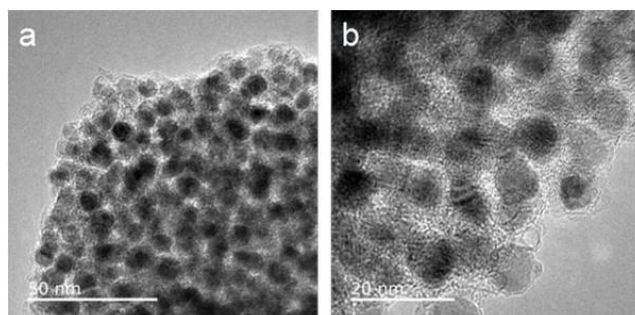

**Fig. S9** TEM images of Ni@C-600 after 8 cycles.
